# Supplementary material for: Global Patterns of Guild Composition and Functional Diversity of Spiders
Source: PubMed Central journal article supplement (PMC3126856; doi:10.1371/journal.pone.0021710), 2011-06-29
Supplement: pone.0021710.s001.pdf [file pone.0021710.s001.pdf]

**Table S1. List of spider families with respective ecological characteristics and the resulting guild category.**

| Family                                     |             |             |        |          |           |           |         |               |               |              |             |        |            |         | Guild |                     |
|--------------------------------------------|-------------|-------------|--------|----------|-----------|-----------|---------|---------------|---------------|--------------|-------------|--------|------------|---------|-------|---------------------|
|                                            | Capture web | Sensing web | No web | Tube web | Sheet web | Space web | Orb web | Ambush hunter | Active hunter | Stenophagous | Euryphagous | Ground | Vegetation | Diurnal |       | Nocturnal           |
| Actinopodidae                              | 0           | 1           | 0      | 1        | 0         | 0         | 0       | 0             | 0             | 0            | 1           | 1      | 0          | 0       | 1     | Sensing web weavers |
| Agelenidae                                 | 1           | 0           | 0      | 1        | 1         | 0         | 0       | 0             | 0             | 0            | 1           | 1      | 1          | 1       | 1     | Sheet web weavers   |
| Amaurobiidae                               | 1           | 0           | 0      | 1        | 1         | 0         | 0       | 0             | 0             | 0            | 1           | 1      | 0          | 0       | 1     | Sheet web weavers   |
| Ammoxenidae                                | 0           | 0           | 1      | 0        | 0         | 0         | 0       | 0             | 1             | 1            | 0           | 1      | 0          | 1       | 1     | Specialists         |
| Amphinectidae 1 (majority)                 | 1           | 0           | 0      | 1        | 1         | 0         | 0       | 0             | 0             | 0            | 1           | 1      | 0          | 0       | 1     | Sheet web weavers   |
| Amphinectidae 2 (Amphinectinae)            | 0           | 0           | 1      | 0        | 0         | 0         | 0       | 0             | 1             | 0            | 1           | 1      | 0          | 0       | 1     | Ground hunters      |
| Anapidae                                   | 1           | 0           | 0      | 0        | 0         | 0         | 1       | 0             | 0             | 0            | 1           | 1      | 0          | 1       | 1     | Orb web weavers     |
| Antrodiaetidae                             | 0           | 1           | 0      | 1        | 0         | 0         | 0       | 0             | 0             | 0            | 1           | 1      | 0          | 0       | 1     | Sensing web weavers |
| Anyphaenidae                               | 0           | 0           | 1      | 0        | 0         | 0         | 0       | 0             | 1             | 0            | 1           | 1      | 1          | 0       | 1     | Other hunters       |
| Araneidae                                  | 1           | 0           | 0      | 0        | 0         | 0         | 1       | 0             | 0             | 0            | 1           | 0      | 1          | 1       | 1     | Orb web weavers     |
| Archaeidae                                 | 0           | 0           | 1      | 0        | 0         | 0         | 0       | 0             | 1             | 1            | 0           | 1      | 1          | 0       | 1     | Specialists         |
| Atypidae                                   | 0           | 1           | 0      | 1        | 0         | 0         | 0       | 0             | 0             | 0            | 1           | 1      | 0          | 1       | 1     | Sensing web weavers |
| Austrochilidae                             | 1           | 0           | 0      | 0        | 1         | 0         | 0       | 0             | 0             | 0            | 1           | 1      | 0          | 0       | 1     | Sheet web weavers   |
| Barychelidae                               | 0           | 1           | 0      | 1        | 0         | 0         | 0       | 0             | 0             | 0            | 1           | 1      | 1          | 0       | 1     | Sensing web weavers |
| Caponiidae                                 | 0           | 0           | 1      | 0        | 0         | 0         | 0       | 0             | 1             | 1            | 0           | 1      | 0          | 1       | 1     | Specialists         |
| Chummiidae                                 | 0           | 0           | 1      | 0        | 0         | 0         | 0       | 0             | 1             | 0            | 1           | 1      | 0          | 1       | 1     | Ground hunters      |
| Cithaeronidae                              | 0           | 0           | 1      | 0        | 0         | 0         | 0       | 0             | 1             | 0            | 1           | 1      | 0          | 0       | 1     | Ground hunters      |
| Clubionidae                                | 0           | 0           | 1      | 0        | 0         | 0         | 0       | 0             | 1             | 0            | 1           | 0      | 1          | 0       | 1     | Other hunters       |
| Corinnidae                                 | 0           | 0           | 1      | 0        | 0         | 0         | 0       | 0             | 1             | 0            | 1           | 1      | 0          | 1       | 1     | Ground hunters      |
| Ctenidae                                   | 0           | 0           | 1      | 0        | 0         | 0         | 0       | 0             | 1             | 0            | 1           | 1      | 1          | 0       | 1     | Other hunters       |
| Ctenizidae                                 | 0           | 1           | 0      | 1        | 0         | 0         | 0       | 0             | 0             | 0            | 1           | 1      | 1          | 0       | 1     | Sensing web weavers |
| Cyatholipidae                              | 1           | 0           | 0      | 0        | 1         | 0         | 0       | 0             | 0             | 0            | 1           | 1      | 1          | 1       | 1     | Sheet web weavers   |
| Cybaeidae                                  | 1           | 0           | 0      | 0        | 1         | 0         | 0       | 0             | 0             | 0            | 1           | 1      | 0          | 1       | 1     | Sheet web weavers   |
| Cycloctenidae                              | 0           | 0           | 1      | 0        | 0         | 0         | 0       | 0             | 1             | 0            | 1           | 1      | 0          | 1       | 1     | Ground hunters      |
| Cyrtachenidae                              | 0           | 1           | 0      | 1        | 0         | 0         | 0       | 0             | 0             | 0            | 1           | 1      | 0          | 0       | 1     | Sensing web weavers |
| Deinopidae                                 | 0           | 0           | 1      | 0        | 0         | 0         | 0       | 1             | 0             | 0            | 1           | 0      | 1          | 1       | 1     | Ambush hunters      |
| Desidae 1 (Toxopinae, Myroninae)           | 1           | 0           | 0      | 1        | 1         | 0         | 0       | 0             | 0             | 0            | 1           | 1      | 1          | 0       | 1     | Sheet web weavers   |
| Desidae 2 (Desinae)                        | 0           | 0           | 1      | 0        | 0         | 0         | 0       | 0             | 1             | 0            | 1           | 1      | 0          | 0       | 1     | Ground hunters      |
| Dictynidae 1 (Dictyninae)                  | 1           | 0           | 0      | 0        | 0         | 1         | 0       | 0             | 0             | 0            | 1           | 1      | 1          | 1       | 1     | Space web weavers   |
| Dictynidae 2 (Cicurinae, Tricholathysinae) | 0           | 0           | 1      | 0        | 0         | 0         | 0       | 0             | 1             | 0            | 1           | 1      | 0          | 1       | 1     | Ground hunters      |
| Diguetidae                                 | 1           | 0           | 0      | 0        | 0         | 1         | 0       | 0             | 0             | 0            | 1           | 1      | 1          | 1       | 0     | Space web weavers   |
| Dipluridae                                 | 1           | 0           | 0      | 1        | 1         | 0         | 0       | 0             | 0             | 0            | 1           | 1      | 0          | 0       | 1     | Sheet web weavers   |
| Drymusidae                                 | 1           | 0           | 0      | 0        | 0         | 1         | 0       | 0             | 0             | 0            | 1           | 1      | 0          | 1       | 1     | Space web weavers   |
| Dysderidae                                 | 0           | 0           | 1      | 0        | 0         | 0         | 0       | 0             | 1             | 1            | 0           | 1      | 0          | 0       | 1     | Specialists         |
| Eresidae                                   | 1           | 0           | 0      | 1        | 1         | 1         | 0       | 0             | 0             | 0            | 1           | 1      | 1          | 1       | 1     | Sheet web weavers   |
| Filistatidae                               | 0           | 1           | 0      | 1        | 0         | 0         | 0       | 0             | 0             | 0            | 1           | 1      | 0          | 0       | 1     | Sensing web weavers |
| Gallieniellidae                            | 0           | 0           | 1      | 0        | 0         | 0         | 0       | 0             | 1             | 1            | 0           | 1      | 0          | 1       | 1     | Specialists         |
| Gnaphosidae                                | 0           | 0           | 1      | 0        | 0         | 0         | 0       | 0             | 1             | 0            | 1           | 1      | 0          | 1       | 1     | Ground hunters      |
| Gradungulidae                              | 0           | 0           | 1      | 0        | 0         | 0         | 0       | 1             | 0             | 1            | 0           | 1      | 0          | 0       | 1     | Ambush hunters      |
| Hahniidae                                  | 1           | 0           | 0      | 0        | 1         | 0         | 0       | 0             | 0             | 0            | 1           | 1      | 0          | 1       | 1     | Sheet web weavers   |
| Hersiliidae                                | 0           | 1           | 0      | 0        | 1         | 0         | 0       | 1             | 0             | 0            | 1           | 1      | 1          | 1       | 1     | Sensing web weavers |
| Hexathelidae                               | 1           | 0           | 0      | 1        | 1         | 0         | 0       | 0             | 0             | 0            | 1           | 1      | 0          | 0       | 1     | Sheet web weavers   |

|                                              |   |   |   |   |   |   |   |   |   |   |   |   |   |   |   |                     |
|----------------------------------------------|---|---|---|---|---|---|---|---|---|---|---|---|---|---|---|---------------------|
| Holarchaeidae                                | 0 | 0 | 1 | 0 | 0 | 0 | 0 | 0 | 1 | 0 | 1 | 1 | 0 | 1 | 1 | Ground hunters      |
| Homalonychidae                               | 0 | 0 | 1 | 0 | 0 | 0 | 0 | 0 | 1 | 0 | 1 | 1 | 0 | 0 | 1 | Ground hunters      |
| Huttoniidae                                  | 0 | 0 | 1 | 0 | 0 | 0 | 0 | 0 | 1 | 0 | 1 | 1 | 0 | 1 | 1 | Ground hunters      |
| Hypochilidae                                 | 1 | 0 | 0 | 0 | 0 | 1 | 0 | 0 | 0 | 0 | 1 | 1 | 0 | 0 | 1 | Space web weavers   |
| Idiopidae                                    | 0 | 1 | 0 | 1 | 0 | 0 | 0 | 0 | 0 | 0 | 1 | 1 | 0 | 0 | 1 | Sensing web weavers |
| Lamponidae                                   | 0 | 0 | 1 | 0 | 0 | 0 | 0 | 0 | 1 | 1 | 0 | 1 | 0 | 0 | 1 | Specialists         |
| Leptonetidae                                 | 1 | 0 | 0 | 0 | 0 | 1 | 0 | 0 | 0 | 0 | 1 | 1 | 0 | 0 | 1 | Space web weavers   |
| Linyphiidae 1<br>(Linyphiinae, Micronetinae) | 1 | 0 | 0 | 0 | 1 | 1 | 0 | 0 | 0 | 0 | 1 | 1 | 1 | 1 | 1 | Sheet web weavers   |
| Linyphiidae 2<br>(Erigoninae and others)     | 0 | 0 | 1 | 0 | 0 | 0 | 0 | 0 | 1 | 0 | 1 | 1 | 1 | 1 | 1 | Other hunters       |
| Liocranidae                                  | 0 | 0 | 1 | 0 | 0 | 0 | 0 | 0 | 1 | 0 | 1 | 1 | 0 | 1 | 1 | Ground hunters      |
| Liphistiidae                                 | 0 | 1 | 0 | 1 | 0 | 0 | 0 | 0 | 0 | 0 | 1 | 1 | 0 | 0 | 1 | Sensing web weavers |
| Lycosidae                                    | 0 | 0 | 1 | 0 | 0 | 0 | 0 | 0 | 1 | 0 | 1 | 1 | 0 | 1 | 1 | Ground hunters      |
| Malkaridae                                   | 0 | 0 | 1 | 0 | 0 | 0 | 0 | 0 | 1 | 0 | 1 | 1 | 0 | 1 | 1 | Ground hunters      |
| Mecicobothriidae                             | 1 | 0 | 0 | 1 | 1 | 0 | 0 | 0 | 0 | 0 | 1 | 1 | 0 | 0 | 1 | Sheet web weavers   |
| Mecysmauchenidae                             | 0 | 0 | 1 | 0 | 0 | 0 | 0 | 0 | 1 | 0 | 1 | 1 | 0 | 1 | 1 | Ground hunters      |
| Micropholcommatidae                          | 1 | 0 | 0 | 0 | 0 | 1 | 0 | 0 | 0 | 0 | 1 | 1 | 0 | 1 | 1 | Space web weavers   |
| Microstigmatidae                             | 0 | 0 | 1 | 0 | 0 | 0 | 0 | 1 | 0 | 0 | 1 | 1 | 0 | 0 | 1 | Ambush hunters      |
| Migidae                                      | 0 | 1 | 0 | 1 | 0 | 0 | 0 | 0 | 0 | 0 | 1 | 1 | 1 | 0 | 1 | Sensing web weavers |
| Mimetidae                                    | 0 | 0 | 1 | 0 | 0 | 0 | 0 | 0 | 1 | 1 | 0 | 1 | 1 | 1 | 1 | Specialists         |
| Miturgidae                                   | 0 | 0 | 1 | 0 | 0 | 0 | 0 | 0 | 1 | 0 | 1 | 1 | 1 | 0 | 1 | Other hunters       |
| Mysmenidae                                   | 1 | 0 | 0 | 0 | 0 | 1 | 1 | 0 | 0 | 0 | 1 | 1 | 1 | 1 | 1 | Space web weavers   |
| Nemesiidae                                   | 0 | 1 | 0 | 1 | 0 | 0 | 0 | 0 | 0 | 0 | 1 | 1 | 0 | 0 | 1 | Sensing web weavers |
| Nephiidae                                    | 1 | 0 | 0 | 0 | 0 | 0 | 1 | 0 | 0 | 0 | 1 | 0 | 1 | 1 | 1 | Orb web weavers     |
| Nesticidae                                   | 1 | 0 | 0 | 0 | 0 | 1 | 0 | 0 | 0 | 0 | 1 | 1 | 0 | 1 | 1 | Space web weavers   |
| Nicodamidae                                  | 1 | 0 | 0 | 0 | 1 | 0 | 0 | 0 | 0 | 0 | 1 | 1 | 0 | 1 | 1 | Sheet web weavers   |
| Ochyroceratidae                              | 1 | 0 | 0 | 0 | 1 | 1 | 0 | 0 | 0 | 0 | 1 | 1 | 0 | 0 | 1 | Sheet web weavers   |
| Oecobiidae                                   | 0 | 1 | 0 | 0 | 1 | 0 | 0 | 1 | 0 | 0 | 1 | 1 | 0 | 1 | 1 | Sensing web weavers |
| Oonopidae                                    | 0 | 0 | 1 | 0 | 0 | 0 | 0 | 0 | 1 | 0 | 1 | 1 | 0 | 0 | 1 | Ground hunters      |
| Orsolobidae                                  | 0 | 0 | 1 | 0 | 0 | 0 | 0 | 0 | 1 | 0 | 1 | 1 | 0 | 0 | 1 | Ground hunters      |
| Oxyopidae                                    | 0 | 0 | 1 | 0 | 0 | 0 | 0 | 0 | 1 | 0 | 1 | 0 | 1 | 1 | 1 | Other hunters       |
| Palpimanidae                                 | 0 | 0 | 1 | 0 | 0 | 0 | 0 | 0 | 1 | 1 | 0 | 1 | 0 | 1 | 1 | Specialists         |
| Pararchaeidae                                | 0 | 0 | 1 | 0 | 0 | 0 | 0 | 0 | 1 | 0 | 1 | 1 | 0 | 1 | 1 | Ground hunters      |
| Paratropididae                               | 0 | 0 | 1 | 0 | 0 | 0 | 0 | 0 | 1 | 0 | 1 | 1 | 0 | 0 | 1 | Ground hunters      |
| Periegopidae                                 | 0 | 0 | 1 | 0 | 0 | 0 | 0 | 0 | 1 | 0 | 1 | 1 | 0 | 1 | 1 | Ground hunters      |
| Philodromidae                                | 0 | 0 | 1 | 0 | 0 | 0 | 0 | 0 | 1 | 0 | 1 | 1 | 1 | 1 | 1 | Other hunters       |
| Pholcidae                                    | 1 | 0 | 0 | 0 | 0 | 1 | 0 | 0 | 0 | 0 | 1 | 1 | 1 | 1 | 1 | Space web weavers   |
| Phyxelididae                                 | 1 | 0 | 0 | 0 | 1 | 1 | 0 | 0 | 0 | 0 | 1 | 1 | 0 | 1 | 1 | Sheet web weavers   |
| Pimoidae                                     | 1 | 0 | 0 | 0 | 1 | 0 | 0 | 0 | 0 | 0 | 1 | 1 | 1 | 0 | 1 | Sheet web weavers   |
| Pisauridae                                   | 1 | 0 | 0 | 1 | 1 | 0 | 0 | 0 | 0 | 0 | 1 | 1 | 1 | 1 | 1 | Sheet web weavers   |
| Plectreuridae                                | 0 | 0 | 1 | 0 | 0 | 0 | 0 | 0 | 1 | 0 | 1 | 1 | 0 | 0 | 1 | Ground hunters      |
| Prodromidae                                  | 0 | 0 | 1 | 0 | 0 | 0 | 0 | 0 | 1 | 0 | 1 | 1 | 0 | 0 | 1 | Ground hunters      |
| Psechridae                                   | 1 | 0 | 0 | 1 | 1 | 0 | 0 | 0 | 0 | 0 | 1 | 0 | 1 | 1 | 1 | Sheet web weavers   |
| Salticidae                                   | 0 | 0 | 1 | 0 | 0 | 0 | 0 | 0 | 1 | 0 | 1 | 1 | 1 | 1 | 0 | Other hunters       |
| Scytodidae                                   | 0 | 0 | 1 | 0 | 0 | 0 | 0 | 0 | 1 | 0 | 1 | 1 | 1 | 1 | 1 | Other hunters       |
| Segestriidae                                 | 0 | 1 | 0 | 1 | 0 | 0 | 0 | 0 | 0 | 0 | 1 | 1 | 1 | 1 | 1 | Sensing web weavers |
| Selenopidae                                  | 0 | 0 | 1 | 0 | 0 | 0 | 0 | 1 | 0 | 0 | 1 | 1 | 1 | 0 | 1 | Ambush hunters      |
| Senoculidae                                  | 0 | 0 | 1 | 0 | 0 | 0 | 0 | 0 | 1 | 0 | 1 | 0 | 1 | 0 | 1 | Other hunters       |
| Sicariidae                                   | 0 | 0 | 1 | 0 | 0 | 0 | 0 | 1 | 0 | 0 | 1 | 1 | 0 | 0 | 1 | Ambush hunters      |
| Sparassidae                                  | 0 | 0 | 1 | 0 | 0 | 0 | 0 | 0 | 1 | 0 | 1 | 1 | 1 | 1 | 1 | Other hunters       |
| Stenochilidae                                | 0 | 0 | 1 | 0 | 0 | 0 | 0 | 0 | 1 | 0 | 1 | 1 | 0 | 1 | 1 | Ground hunters      |
| Stiphidiidae                                 | 1 | 0 | 0 | 0 | 1 | 0 | 0 | 0 | 0 | 0 | 1 | 1 | 0 | 1 | 1 | Sheet web weavers   |
| Symphytognathidae                            | 1 | 0 | 0 | 0 | 0 | 0 | 1 | 0 | 0 | 0 | 1 | 1 | 0 | 1 | 1 | Orb web weavers     |

|                          |   |   |   |   |   |   |   |   |   |   |   |   |   |   |   |                     |
|--------------------------|---|---|---|---|---|---|---|---|---|---|---|---|---|---|---|---------------------|
| <b>Synsphyridae</b>      | 1 | 0 | 0 | 0 | 1 | 0 | 0 | 0 | 0 | 0 | 1 | 1 | 0 | 1 | 1 | Sheet web weavers   |
| <b>Synotaxidae</b>       | 1 | 0 | 0 | 0 | 1 | 1 | 1 | 0 | 0 | 0 | 1 | 0 | 1 | 0 | 1 | Orb web weavers     |
| <b>Telemidae</b>         | 1 | 0 | 0 | 0 | 1 | 0 | 0 | 0 | 0 | 1 | 0 | 1 | 0 | 0 | 1 | Specialists         |
| <b>Tengellidae</b>       | 0 | 0 | 1 | 0 | 0 | 0 | 0 | 0 | 1 | 0 | 1 | 1 | 1 | 1 | 1 | Other hunters       |
| <b>Tetrablemmidae</b>    | 1 | 0 | 0 | 0 | 1 | 0 | 0 | 0 | 0 | 0 | 1 | 1 | 0 | 1 | 1 | Sheet web weavers   |
| <b>Tetragnathidae</b>    | 1 | 0 | 0 | 0 | 0 | 0 | 1 | 0 | 0 | 0 | 1 | 0 | 1 | 1 | 1 | Orb web weavers     |
| <b>Theraphosidae</b>     | 0 | 1 | 0 | 1 | 0 | 0 | 0 | 0 | 0 | 0 | 1 | 1 | 1 | 0 | 1 | Sensing web weavers |
| <b>Theridiidae</b>       | 1 | 0 | 0 | 0 | 0 | 1 | 0 | 0 | 0 | 0 | 1 | 1 | 1 | 1 | 1 | Space web weavers   |
| <b>Theridiosomatidae</b> | 1 | 0 | 0 | 0 | 0 | 0 | 1 | 0 | 0 | 0 | 1 | 1 | 1 | 1 | 1 | Orb web weavers     |
| <b>Thomisidae</b>        | 0 | 0 | 1 | 0 | 0 | 0 | 0 | 1 | 0 | 0 | 1 | 1 | 1 | 1 | 1 | Ambush hunters      |
| <b>Titanoecidae</b>      | 1 | 0 | 0 | 1 | 0 | 1 | 0 | 0 | 0 | 0 | 1 | 1 | 0 | 1 | 1 | Space web weavers   |
| <b>Trechaleidae</b>      | 0 | 0 | 1 | 0 | 0 | 0 | 0 | 0 | 1 | 1 | 0 | 0 | 1 | 1 | 1 | Specialists         |
| <b>Trochanteridae</b>    | 0 | 0 | 1 | 0 | 0 | 0 | 0 | 0 | 1 | 0 | 1 | 1 | 0 | 0 | 1 | Ground hunters      |
| <b>Uloboridae</b>        | 1 | 0 | 0 | 0 | 0 | 0 | 1 | 0 | 0 | 0 | 1 | 0 | 1 | 1 | 1 | Orb web weavers     |
| <b>Zodariidae</b>        | 0 | 0 | 1 | 0 | 0 | 0 | 0 | 1 | 1 | 1 | 0 | 1 | 0 | 1 | 1 | Specialists         |
| <b>Zoridae</b>           | 0 | 0 | 1 | 0 | 0 | 0 | 0 | 0 | 1 | 0 | 1 | 1 | 0 | 1 | 1 | Ground hunters      |
| <b>Zorocratidae</b>      | 0 | 0 | 1 | 0 | 0 | 0 | 0 | 0 | 1 | 0 | 1 | 1 | 0 | 1 | 1 | Ground hunters      |
| <b>Zoropsidae</b>        | 1 | 0 | 0 | 0 | 1 | 0 | 0 | 0 | 0 | 0 | 1 | 1 | 0 | 1 | 1 | Sheet web weavers   |
